# Supplementary material for: Commitments by the biopharmaceutical industry to clinical trial transparency: the evolving environment
Source: PubMed Central journal article supplement (PMC6837245; doi:10.1136/bmjebm-2018-111145), 2019-03-21
Supplement: bmjebm-2018-111145supp002.pdf [file bmjebm-2018-111145supp002.pdf]

## Commitments by the biopharmaceutical industry to clinical trial transparency: the evolving environment

### Supplementary material

**Table S1 Key elements of the ‘Final Rule’, EMA clinical data publication policy 0070 and EMA clinical trial regulation EU no. 536/2014**

|                                   | <b>FDAAA 801 the ‘Final Rule’<sup>1</sup></b>                                                                   | <b>EMA clinical data publication policy 0070<sup>2</sup></b>                                                                                  | <b>EMA clinical trial regulation EU no. 536/2014<sup>3 4</sup></b>                                                                                                                                                                           |
|-----------------------------------|-----------------------------------------------------------------------------------------------------------------|-----------------------------------------------------------------------------------------------------------------------------------------------|----------------------------------------------------------------------------------------------------------------------------------------------------------------------------------------------------------------------------------------------|
| <b>Medicinal products covered</b> | FDA-regulated products that have not yet been approved, licensed or cleared by the FDA                          | Centrally authorised products only                                                                                                            | Investigational medicinal products regardless of whether they have a marketing authorisation                                                                                                                                                 |
| <b>Clinical studies covered</b>   | Includes all clinical trials for products as listed above                                                       | Clinical studies submitted to the agency as an MAA, Article 58, line extension or new indication, regardless of where the study was conducted | Clinical trials conducted in the EU and paediatric trials conducted outside the EU that are part of paediatric investigation plans                                                                                                           |
| <b>Documents published</b>        | Additional registration, summary results, full protocol and SAP, including more frequent updates to posted data | Clinical data overview (clinical overview, clinical summaries and CSRs) and the anonymisation report                                          | All clinical trial-related information generated during the life cycle of a clinical trial (e.g. protocol, assessment of and decision on trial conduct, and summary of trial results including a lay summary, study reports and inspections) |
| <b>Publication channel</b>        | ClinicalTrials.gov                                                                                              | <a href="https://clinicaldata.ema.europa.eu">https://clinicaldata.ema.europa.eu</a>                                                           | Future EU portal and database ( <a href="https://eudract.ema.europa.eu">https://eudract.ema.europa.eu</a> until that time)                                                                                                                   |
| <b>Effective date</b>             | 18 January 2017                                                                                                 | 1 January 2015 (MAA or Article 58) or 1 July 2015 (line extension or new indication)                                                          | October 2018                                                                                                                                                                                                                                 |
| <b>Posted from</b>                | 18 April 2018                                                                                                   | October 2016                                                                                                                                  | 2019                                                                                                                                                                                                                                         |

Adapted from: Panayi A, Baronikova S. A new age of transparency: do we fully understand the implications? International Society for Medical Publication Professionals, Inc. (ISMPP). 2017.

CSR, clinical study report; EMA, European Medicines Agency; FDA, US Food and Drug Administration; FDAAA, US Food and Drug Administration Amendments Act; MAA, marketing authorisation application; SAP, statistical analysis plan.

**Table S2 EFPIA and/or PhRMA membership status and availability of results in TrialsTracker (December 2017–January 2018)**

| <b>Company rank by 2015 worldwide prescription sales*</b> | <b>EFPIA only†</b> | <b>PhRMA only†</b> | <b>Both EFPIA &amp; PhRMA†</b> | <b>Not EFPIA or PhRMA†</b> | <b>Results in TrialsTracker‡</b> |
|-----------------------------------------------------------|--------------------|--------------------|--------------------------------|----------------------------|----------------------------------|
| Pfizer                                                    |                    |                    | ✓                              |                            | ✓                                |
| Novartis                                                  |                    |                    | ✓                              |                            | ✓                                |
| Roche                                                     | ✓                  |                    |                                |                            | X                                |
| Merck (Merck.com)                                         |                    |                    | ✓                              |                            | ✓                                |
| Sanofi                                                    |                    |                    | ✓                              |                            | ✓                                |
| Gilead Sciences                                           |                    |                    |                                | ✓                          | ✓                                |
| J & J                                                     |                    |                    | ✓                              |                            | ✓                                |
| GSK                                                       |                    |                    | ✓                              |                            | ✓                                |
| AstraZeneca                                               |                    |                    | ✓                              |                            | ✓                                |
| Abbvie                                                    |                    |                    | ✓                              |                            | ✓                                |
| Amgen                                                     |                    |                    | ✓                              |                            | ✓                                |
| Allergan                                                  |                    | ✓                  |                                |                            | ✓                                |
| Teva                                                      |                    |                    | ✓                              |                            | X                                |
| Novo Nordisk                                              |                    |                    | ✓                              |                            | ✓                                |
| Eli Lilly                                                 |                    |                    | ✓                              |                            | ✓                                |
| Bayer                                                     |                    |                    | ✓                              |                            | ✓                                |
| Bristol-Myers Squibb                                      |                    |                    | ✓                              |                            | ✓                                |
| Takeda                                                    |                    |                    | ✓                              |                            | ✓                                |
| Boehringer Ingelheim                                      |                    |                    | ✓                              |                            | ✓                                |
| Astellas Pharma                                           |                    |                    | ✓                              |                            | ✓                                |
| Mylan                                                     |                    |                    |                                | ✓                          | X                                |
| Biogen                                                    |                    |                    | ✓                              |                            | ✓                                |
| Celgene                                                   |                    |                    | ✓                              |                            | ✓                                |
| Merck KGaA (Merckgroup.com)                               | ✓                  |                    |                                |                            | ✓                                |
| Daiichi Sankyo                                            |                    |                    | ✓                              |                            | ✓                                |
| Valeant Pharma Int                                        |                    |                    |                                | ✓                          | ✓                                |
| Otsuka                                                    |                    |                    | ✓                              |                            | ✓                                |
| CSL                                                       |                    |                    |                                | ✓                          | X                                |
| Baxalta                                                   |                    |                    |                                | ✓                          | X                                |
| Shire                                                     | ✓                  |                    |                                |                            | ✓                                |
| Sun Pharma Ind                                            |                    |                    |                                | ✓                          | X                                |
| Servier                                                   | ✓                  |                    |                                |                            | X                                |
| Eisai                                                     |                    |                    | ✓                              |                            | ✓                                |
| UCB                                                       | ✓                  |                    |                                |                            | ✓                                |
| Abbott Labs                                               |                    |                    |                                | ✓                          | ✓                                |
| Fresenius                                                 |                    |                    |                                | ✓                          | X                                |

|                           |   |   |  |   |   |
|---------------------------|---|---|--|---|---|
| Grifols                   |   |   |  | ✓ | X |
| Chugai Pharma             |   |   |  | ✓ | X |
| CJ (CheilJedand)          |   |   |  | ✓ | X |
| Malincrodt                |   |   |  | ✓ | X |
| Sumitomo                  |   |   |  | ✓ | X |
| Endo Int                  |   |   |  | ✓ | X |
| Menarini                  | ✓ |   |  |   | X |
| Regeneron Pharmaceuticals |   |   |  | ✓ | X |
| Alexion Pharma            |   | ✓ |  |   | X |
| Aspen Pharmacare          |   |   |  | ✓ | X |
| Mitsubishi Tanabe Pharma  |   |   |  | ✓ | ✓ |
| Nestlé                    |   |   |  | ✓ | ✓ |
| Meda                      |   |   |  | ✓ | X |
| Hospira                   |   |   |  | ✓ | X |

\*EvaluatePharma®, April 2016.

†EFPIA/PhRMA members webpage, December 2017–January 2018.

‡TrialsTracker (updated April 2017).

## Data analysis

A comparison of proportions (e.g. all industry, the top 50 companies and EFPIA/PhRMA members in the top 50 companies compared with non-industry clinical trial sponsors, and EFPIA/PhRMA members vs non-members in the top 50 biopharmaceutical companies with statements committing to responsible data transparency) was calculated as follows (note that the comparison of clinical trial disclosure for industry and non-industry sponsors is used as an example):

- proportion of trials disclosed by industry ( $p^1$ ) =  $\frac{\text{disclosed industry trials } (n^1)}{\text{total industry trials } (N^1)}$
- proportion of trials disclosed by non-industry ( $p^2$ ) =  $\frac{\text{disclosed non-industry trials } (n^2)}{\text{total non-industry trials } (N^2)}$
- sample proportion ( $\hat{p}$ ) =  $\frac{((p^1 \times N^1) + (p^2 \times N^2))}{(N^1 + N^2)}$
- standard error (SE) =  $\sqrt{((\hat{p} \times (1 - \hat{p}))) \times \frac{(N^1 + N^2)}{(N^1 \times N^2)}}$
- z-score =  $\frac{(p^1 - p^2)}{SE}$

| Confidence level | z-score (standard deviations) | P value |
|------------------|-------------------------------|---------|
| 90%              | < -1.65 or > +1.65            | < 0.10  |
| 95%              | < -1.96 or > +1.96            | < 0.05  |
| 99%              | < -2.58 or > +2.58            | < 0.01  |

- 95% confidence interval for the difference in the proportion of disclosed clinical trials ( $p^1 - p^2$ ):
  - lower limit =  $(p^1 - p^2) - (1.96 \times SE)$
  - upper limit =  $(p^1 - p^2) + (1.96 \times SE)$

The null hypothesis ( $H_0$ ) was for no difference in the proportions of disclosed trials between industry and non-industry sponsors.

**Table S3 Comparison of disclosure rates for all industry, the top 50 biopharmaceutical companies and EFPIA/PhRMA members in the top 50 biopharmaceutical companies compared with non-industry sponsors.**

| <b>Year</b>    | <b>Sponsor</b> | <b>N</b> | <b>n</b> | <b>Proportions, %</b> | <b>SE</b> | <b>95% CI</b> | <b>Significance</b> |
|----------------|----------------|----------|----------|-----------------------|-----------|---------------|---------------------|
| <b>2006</b>    | All industry   | 851      | 342      | 40.2                  | 0.022     | 0.083–0.171   | <i>p</i> < 0.01     |
|                | Non-industry   | 921      | 253      | 27.5                  |           |               |                     |
| <b>2007</b>    | All industry   | 1063     | 569      | 53.5                  | 0.020     | 0.192–0.269   | <i>p</i> < 0.01     |
|                | Non-industry   | 1478     | 451      | 30.5                  |           |               |                     |
| <b>2008</b>    | All industry   | 1361     | 1094     | 80.4                  | 0.017     | 0.221–0.288   | <i>p</i> < 0.01     |
|                | Non-industry   | 1774     | 975      | 55.0                  |           |               |                     |
| <b>2009</b>    | All industry   | 1223     | 1005     | 82.2                  | 0.017     | 0.226–0.293   | <i>p</i> < 0.01     |
|                | Non-industry   | 2063     | 1160     | 56.2                  |           |               |                     |
| <b>2010</b>    | All industry   | 1108     | 902      | 81.4                  | 0.018     | 0.257–0.327   | <i>p</i> < 0.01     |
|                | Non-industry   | 2217     | 1157     | 52.2                  |           |               |                     |
| <b>2011</b>    | All industry   | 997      | 811      | 81.3                  | 0.018     | 0.270–0.342   | <i>p</i> < 0.01     |
|                | Non-industry   | 2444     | 1241     | 50.8                  |           |               |                     |
| <b>2012</b>    | All industry   | 914      | 761      | 83.3                  | 0.019     | 0.291–0.365   | <i>p</i> < 0.01     |
|                | Non-industry   | 2630     | 1326     | 50.4                  |           |               |                     |
| <b>2013</b>    | All industry   | 916      | 714      | 77.9                  | 0.019     | 0.291–0.366   | <i>p</i> < 0.01     |
|                | Non-industry   | 2609     | 1177     | 45.1                  |           |               |                     |
| <b>2014</b>    | All industry   | 763      | 617      | 80.9                  | 0.020     | 0.390–0.470   | <i>p</i> < 0.01     |
|                | Non-industry   | 2712     | 1026     | 37.8                  |           |               |                     |
| <b>2015</b>    | All industry   | 315      | 222      | 70.5                  | 0.032     | 0.340–0.464   | <i>p</i> < 0.01     |
|                | Non-industry   | 1018     | 308      | 30.3                  |           |               |                     |
| <b>Overall</b> | All industry   | 9511     | 7037     | 74.0                  | 0.006     | 0.271–0.295   | <i>p</i> < 0.01     |

|              |        |      |      |       |             |            |
|--------------|--------|------|------|-------|-------------|------------|
| Non-industry | 19 866 | 9074 | 45.7 |       |             |            |
| Top 50       | 6179   | 4698 | 76.0 | 0.007 | 0.289–0.318 | $p < 0.01$ |
| Non-industry | 19 866 | 9074 | 45.7 |       |             |            |
| EFPIA/PhRMA  | 5785   | 4434 | 76.5 | 0.007 | 0.293–0.322 | $p < 0.01$ |
| Non-industry | 19 866 | 9074 | 45.7 |       |             |            |

CI, confidence interval; EFPIA, European Federation of Pharmaceutical Industries and Associations; PhRMA, Pharmaceutical Research and Manufacturers of America; SE, standard error.

**Table S4 Availability of reference to transparency in clinical trial data disclosure for non-industry institutions.**

| <b>Institution</b> | <b>Disclosed trials, n</b> | <b>Total eligible trials, N</b> | <b>Proportion of trials disclosed, %</b> | <b>Reference found to transparency in clinical trial data disclosure?</b> |
|--------------------|----------------------------|---------------------------------|------------------------------------------|---------------------------------------------------------------------------|
| <b>1</b>           | 394                        | 570                             | 69.1                                     | Yes                                                                       |
| <b>2</b>           | 353                        | 418                             | 84.4                                     | No                                                                        |
| <b>3</b>           | 171                        | 339                             | 50.4                                     | No                                                                        |
| <b>4</b>           | 112                        | 329                             | 34.0                                     | No                                                                        |
| <b>5</b>           | 205                        | 318                             | 64.5                                     | No                                                                        |
| <b>6</b>           | 149                        | 278                             | 53.6                                     | No                                                                        |
| <b>7</b>           | 153                        | 259                             | 59.1                                     | No                                                                        |
| <b>8</b>           | 88                         | 241                             | 36.5                                     | No                                                                        |
| <b>9</b>           | 138                        | 241                             | 57.3                                     | No                                                                        |
| <b>10</b>          | 65                         | 226                             | 28.8                                     | No                                                                        |

**Table S5 Exploratory analysis of the availability of results for 12 clinical trials sponsored by four biopharmaceutical companies listed in TrialsTracker**

| <b>Clinical trial</b> | <b>Results posted in ClinicalTrials.gov</b> | <b>PubMed indexed in ClinicalTrials.gov</b> | <b>Publications found in PubMed</b> | <b>Scholar</b>      | <b>Google</b>          | <b>EU Clinical Trials Register (CTR)</b> | <b>Company website</b> |
|-----------------------|---------------------------------------------|---------------------------------------------|-------------------------------------|---------------------|------------------------|------------------------------------------|------------------------|
| 1                     | No                                          | No                                          | No                                  | No                  | Link to EU CTR summary | Yes                                      | No                     |
| 2                     | Yes                                         | No                                          | No                                  | No                  | No                     | Yes                                      | No                     |
| 3                     | Yes                                         | Yes                                         | Yes                                 | Link to publication | Link to CT.gov         | Yes                                      | No                     |
| 4                     | Yes                                         | Yes                                         | Yes                                 | Link to publication | Link to CT.gov         | Yes                                      | No                     |
| 5                     | Yes                                         | No                                          | No                                  | Link to publication | Link to CT.gov         | No                                       | No                     |
| 6                     | Yes                                         | Yes                                         | Yes                                 | Link to publication | Link to CT.gov         | No                                       | No                     |
| 7                     | No                                          | No                                          | No                                  | Link to publication | No                     | No                                       | No                     |
| 8                     | Yes                                         | No                                          | No                                  | No                  | Link to CT.gov         | No                                       | Yes                    |
| 9                     | Yes                                         | Yes                                         | No                                  | Link to publication | Link to CT.gov         | No                                       | Yes                    |
| 10                    | Yes                                         | Yes                                         | Yes                                 | Link to publication | Link to CT.gov         | Yes                                      | Yes                    |
| 11                    | No                                          | No                                          | No                                  | No                  | No                     | No                                       | Yes                    |
| 12                    | Yes                                         | No                                          | Yes                                 | Link to publication | Link to CT.gov         | Yes                                      | Yes                    |



## REFERENCES

1. National Institutes of Health, Department of Health and Human Services. Clinical trials registration and results information submission. Final rule. 2016. Available from <https://www.ncbi.nlm.nih.gov/pubmed/27658315> (accessed 02 February 2018).
2. Regulation (EU) 536/2014 of the European Parliament and of the Council of 16 April 2014 on clinical trials on medicinal products for human use, and repealing Directive 2001/20/EC. 2014. Available from [https://ec.europa.eu/health/sites/health/files/files/eudralex/vol-1/reg\\_2014\\_536/reg\\_2014\\_536\\_en.pdf](https://ec.europa.eu/health/sites/health/files/files/eudralex/vol-1/reg_2014_536/reg_2014_536_en.pdf) (accessed 10 April 2018).
3. European Medicines Agency. European Medicines Agency policy on publication of clinical data for medicinal products for human use. 2015. Available from [http://www.ema.europa.eu/docs/en\\_GB/document\\_library/Other/2014/10/WC500174796.pdf](http://www.ema.europa.eu/docs/en_GB/document_library/Other/2014/10/WC500174796.pdf) (accessed 09 March 2018).
4. Panayi A, Baronikova S. A new age of transparency: do we fully understand the implications? International Society for Medical Publication Professionals, Inc. (ISMPP). 2017. Available from <http://ismpp-newsletter.com/2017/06/29/a-new-age-of-transparency-do-we-fully-understand-the-implications/> (accessed 23 March 2018).
